# Supplementary material for: Early motor outcomes in infants with critical congenital heart disease are related to neonatal brain development and brain injury
Source: PubMed Central journal article supplement — Dev Med Child Neurol. 2021 Aug 20;64(2):192–9. doi: 10.1111/dmcn.15024 (PMC9290970; doi:10.1111/dmcn.15024), 2021-08-20
Supplement: DMCN-64-192-s001.pdf [file DMCN-64-192-s001.pdf]

**Table S3 Neonatal arterial ischemic stroke with corticospinal tract involvement and early neuromotor outcomes**

|                                                  | <b>No neonatal AIS with<br/>CST-involvement</b> | <b>Neonatal AIS with<br/>CST-involvement</b> |
|--------------------------------------------------|-------------------------------------------------|----------------------------------------------|
| <b><u>3 MONTHS</u></b>                           | <b>N=42</b>                                     | <b>N=5</b>                                   |
| <b>GMs/FMs</b>                                   |                                                 |                                              |
| Abnormal GMs/FMs absent, <i>n (%)</i>            | 5 (12)                                          | 3 (60)                                       |
| <b>Muscle tone</b>                               | 11 (27)*                                        | 4 (80)                                       |
| Abnormal, <i>n (%)</i>                           | 10 (8-12)                                       | 8 (6-8)                                      |
| <b>Bayley-III-NL</b>                             | 8 (19)                                          | 2 (40)                                       |
| Fine motor scaled score, <i>median (IQR)</i>     | 10 (8-12)                                       | 8 (7.5-9.5)                                  |
| $\leq 7$ (-1SD), <i>n (%)</i>                    | 7 (17)                                          | 1 (20)                                       |
|                                                  | 0 (0)                                           | 1 (20)                                       |
| Gross motor scaled score, <i>median (IQR)</i>    |                                                 |                                              |
| $\leq 7$ (-1SD), <i>n (%)</i>                    |                                                 |                                              |
| <b>High risk of cerebral palsy, <i>n (%)</i></b> |                                                 |                                              |
| <b><u>9 MONTHS</u></b>                           | <b>N=44</b>                                     | <b>N=5</b>                                   |
| <b>Muscle tone</b>                               |                                                 |                                              |
| Abnormal, <i>n (%)</i>                           | 12 (28)*                                        | 3 (75)*                                      |
| <b>Bayley-III-NL</b>                             | 10 (10-12)                                      | 9 (9-10)                                     |
| Fine motor scaled score, <i>median (IQR)</i>     | 2 (5)                                           | 0 (0)                                        |
| $\leq 7$ (-1SD), <i>n (%)</i>                    | 9 (7-12)                                        | 4 (3-8.5)                                    |
|                                                  | 14 (32)                                         | 4 (80)                                       |
| Gross motor scaled score, <i>median (IQR)</i>    | 5 (11)                                          | 3 (60)                                       |
|                                                  | 0 (0)                                           | 2 (40)                                       |

|                                                    |                      |                            |
|----------------------------------------------------|----------------------|----------------------------|
| $\leq 7$ (-1SD), <i>n</i> (%)                      |                      |                            |
| $\leq 4$ (-2SD), <i>n</i> (%)                      |                      |                            |
| <b>High risk of cerebral palsy, <i>n</i> (%)</b>   |                      |                            |
| <b><u>18 MONTHS</u></b>                            | <b>N=45</b>          | <b>N=3/5<sup>***</sup></b> |
| <b>Muscle tone</b>                                 |                      |                            |
|                                                    | 5 (12) <sup>**</sup> | 2 (67)                     |
| Abnormal, <i>n</i> (%)                             |                      |                            |
| <b>Bayley-III-NL</b>                               | 12 (11-13)           | 10, 10, 12                 |
|                                                    | 2 (4)                | 0 (0)                      |
| Fine motor scaled score, <i>median (IQR)</i>       | 11 (9-12)            | 10, 11, 13                 |
| $\leq 7$ (-1SD), <i>n</i> (%)                      | 9 (20)               | 0 (0)                      |
|                                                    | 3 (7)                | 0 (0)                      |
| Gross motor scaled score, <i>median (IQR)</i>      | 1 (2)                | 0 (0)                      |
| $\leq 7$ (-1SD), <i>n</i> (%)                      |                      |                            |
| $\leq 4$ (-2SD), <i>n</i> (%)                      |                      |                            |
| <b>Development of cerebral palsy, <i>n</i> (%)</b> |                      |                            |

Continuous data are presented as median (25-75 percentile) and categorical data as number (%). Mean uncorrected differences are shown for motor outcomes at 3 and 9 months.

\*In one infant muscle tone data was missing.

\*\*In three infants muscle tone data were missing.

\*\*\* Absolute values of 3 infants with CCHD with neonatal arterial ischemic stroke with corticospinal tract (CST) involvement were described at 18 months (n=2, loss to follow-up). Two infants were known with hemiparesis and were unable to visit the outpatient clinic because of a poor clinical condition and receiving therapy at the rehabilitation centre.
