# Supplementary material for: Early motor outcomes in infants with critical congenital heart disease are related to neonatal brain development and brain injury
Source: PubMed Central journal article supplement — Dev Med Child Neurol. 2021 Aug 20;64(2):192–9. doi: 10.1111/dmcn.15024 (PMC9290970; doi:10.1111/dmcn.15024), 2021-08-20
Supplement: DMCN-64-192-s003.pdf [file DMCN-64-192-s003.pdf]

**Table S2 Neonatal white matter injury and early neuromotor outcomes**

|                                                  | <b>No neonatal<br/>white matter<br/>injury</b> | <b>Neonatal<br/>white matter<br/>injury</b> | <b>Uncorrected<br/>difference<br/>(95% CI)</b> | <b>Corrected<br/>difference<br/>(95% CI)</b> |
|--------------------------------------------------|------------------------------------------------|---------------------------------------------|------------------------------------------------|----------------------------------------------|
| <b><u>3 MONTHS</u></b>                           | <b>N=18</b>                                    | <b>N=29</b>                                 |                                                |                                              |
| <b>GMs/FMs</b>                                   |                                                |                                             |                                                |                                              |
| Abnormal GMs/FMs absent, <i>n (%)</i>            | 4 (22)                                         | 4 (14)                                      |                                                |                                              |
| <b>Muscle tone</b>                               |                                                |                                             |                                                |                                              |
| Abnormal, <i>n (%)</i>                           | 6 (33)                                         | 9 (32)**                                    |                                                |                                              |
| <b>Bayley-III-NL</b>                             |                                                |                                             |                                                |                                              |
| Fine motor scaled score, <i>mean +/- SD</i>      | 9.7 +/- 3.1                                    | 9.7 +/- 2.8                                 | -0.1 (-1.8 to 1.7)                             |                                              |
| ≤7 (-1SD) , <i>n (%)</i>                         | 4 (22)                                         | 6 (21)                                      |                                                |                                              |
| Gross motor scaled score, <i>median</i>          | 9.5 (8.0-12.0)                                 | 10.0 (8.0-12.0)                             | 0.2 (-1.2 to 1.6)                              |                                              |
| ( <i>IQR</i> )                                   | 3 (17)                                         | 5 (17)                                      |                                                |                                              |
| ≤7 (-1SD) , <i>n (%)</i>                         | 0 (0)                                          | 1 (4)                                       |                                                |                                              |
| ≤4 (-2SD) , <i>n (%)</i>                         | 0 (0)                                          | 1 (4)                                       |                                                |                                              |
| <b>High risk of cerebral palsy, <i>n (%)</i></b> |                                                |                                             |                                                |                                              |
| <b><u>9 MONTHS</u></b>                           | <b>N=18</b>                                    | <b>N=31</b>                                 |                                                |                                              |
| <b>Muscle tone</b>                               |                                                |                                             |                                                |                                              |
| Abnormal, <i>n (%)</i>                           | 5 (26)                                         | 10 (34)                                     |                                                |                                              |
| <b>Bayley-III-NL</b>                             |                                                |                                             |                                                |                                              |

|                                                                                                                                     |                                                                         |                                                                         |                                  |                             |
|-------------------------------------------------------------------------------------------------------------------------------------|-------------------------------------------------------------------------|-------------------------------------------------------------------------|----------------------------------|-----------------------------|
| Fine motor scaled score, <i>median</i><br>( <i>IQR</i> )<br><br>$\leq 7$ (-1SD), <i>n</i> (%)                                       | 11.0 (10.0-<br>12.0)<br><br>0 (0)                                       | 10.0 (9.0-11.0)<br><br>2 (7)                                            | -0.8 (-1.8 to 0.1)               | -0.8 (-1.8 to 0.1)          |
| Gross motor scaled score, <i>mean +/-</i><br><i>SD</i><br><br>$\leq 7$ (-1SD), <i>n</i> (%)<br><br>$\leq 4$ (-2SD), <i>n</i> (%)    | 10.4 +/- 3.2<br><br><b>3 (17)*</b><br><br>1 (6)<br><br>1 (6)            | 8.0 +/- 3.2<br><br><b>15 (48)*</b><br><br>7 (23)<br><br>1 (4)           | <b>-2.4 (-4.4 to -<br/>0.5)*</b> | <b>-2.4 (-4.3 to -0.5)*</b> |
| <b>High risk of cerebral palsy, <i>n</i> (%)</b>                                                                                    |                                                                         |                                                                         |                                  |                             |
| <b><u>18 MONTHS</u></b>                                                                                                             | <b>N=19</b>                                                             | <b>N=29</b>                                                             |                                  |                             |
| <b>Muscle tone</b>                                                                                                                  |                                                                         |                                                                         |                                  |                             |
| Abnormal, <i>n</i> (%)                                                                                                              | 1 (6) <sup>***</sup>                                                    | 6 (21)                                                                  |                                  |                             |
| <b>Bayley-III-NL</b>                                                                                                                |                                                                         |                                                                         |                                  |                             |
| Fine motor scaled score, <i>median</i><br>( <i>IQR</i> )<br><br>$\leq 7$ (-1SD), <i>n</i> (%)                                       | 12.0 (10.0-<br>13.0)<br><br>1 (5)                                       | 12.0 (10.5-<br>12.5)<br><br>1 (3)                                       | 0.02 (-1.2 to 1.3)               | 0.02 (-1.1 to 1.2)          |
| Gross motor scaled score, <i>median</i><br>( <i>IQR</i> )<br><br>$\leq 7$ (-1SD), <i>n</i> (%)<br><br>$\leq 4$ (-2SD), <i>n</i> (%) | 11.0 (9.0-12.0)<br><br>2 (11)<br><br>1 (5)<br><br>0 (0) <sup>****</sup> | 11.0 (7.5-12.0)<br><br>7 (24)<br><br>2 (7)<br><br>1 (3) <sup>****</sup> | -0.4 (-2.1 to 1.2)               | -0.4 (-1.9 to 1.1)          |
| <b>Development of cerebral palsy, <i>n</i></b><br>(%)                                                                               |                                                                         |                                                                         |                                  |                             |

Normally continuous distributed data are presented as mean +/- SD, not-normally continuous distributed data as median (25-75 percentile), and categorical data as number (%). Mean differences (with 95% CI) are corrected for repeated cardiac surgery at 9 and

18 months.

**\*P-value < 0.05**

\*\*In one infant muscle tone data was missing.

\*\*\*In three infants muscle tone data were missing.

\*\*\*\*2 infants with a high risk of cerebral palsy at 3 months (with neonatal WMI) and 9 months (without neonatal WMI) were unable to visit the outpatient clinic at 18 months because of a poor clinical condition and receiving therapy at the rehabilitation centre.
