# Supplementary material for: Early motor outcomes in infants with critical congenital heart disease are related to neonatal brain development and brain injury
Source: PubMed Central journal article supplement — Dev Med Child Neurol. 2021 Aug 20;64(2):192–9. doi: 10.1111/dmcn.15024 (PMC9290970; doi:10.1111/dmcn.15024), 2021-08-20
Supplement: DMCN-64-192-s004.pdf [file DMCN-64-192-s004.pdf]

**Table S1 Early neuromotor outcomes**

|                                               | <b>3 months</b>                             | <b>9 months</b>                    | <b>18 months</b>                            |
|-----------------------------------------------|---------------------------------------------|------------------------------------|---------------------------------------------|
| <b>Age, months median (IQR)</b>               | 3 (3-4)                                     | 10 (9-10)                          | 19 (18-20)                                  |
| <b>General/Fidgety movements, n (%)</b>       | <b>n=47<sup>*(2), ***(2a)</sup></b>         |                                    |                                             |
| Normal optimal GMs                            | 29 (62)                                     |                                    |                                             |
| Normal suboptimal GMs                         | 10 (21)                                     |                                    |                                             |
| Abnormal mildly GMs/FMs absent                | 3 (6)                                       |                                    |                                             |
| Abnormal definitely GMs/FMs absent            | 5 (11)                                      |                                    |                                             |
| <b>Muscle tone, n (%)</b>                     | <b>n=46<sup>*(2), ***(1), ***(2a)</sup></b> | <b>n=47<sup>*(2), ***(2)</sup></b> | <b>n=45<sup>*(1), ***(3), ***(2b)</sup></b> |
| Abnormal                                      | 20 (43)                                     | 16 (34)                            | 10 (22)                                     |
| Axial hypertonicity/hypotonicity              | 3 (7) / 16 (35)                             | 2 (4) / 6 (13)                     | 1 (2) / 4 (9)                               |
| Upper extremities hypertonicity/hypotonicity  | 4 (9) / 0 (0)                               | 3 (6) / 2 (4)                      | 1 (2) / 5 (11)                              |
| Lower extremities hypertonicity/hypotonicity  | 6 (13) / 0 (0)                              | 8 (17) / 4 (9)                     | 3 (7) / 7 (16)                              |
| <b>Bayley-III-NL</b>                          | <b>n=47<sup>*(2), ***(2a)</sup></b>         | <b>n=49<sup>*(1), ***(1)</sup></b> | <b>n=48<sup>*(1), ***(2b)</sup></b>         |
| Fine motor scaled score, <i>median (IQR)</i>  | 9 (8-12)                                    | 10 (9-12)                          | 12 (10-13)                                  |
| $\leq 7$ (-1SD), n (%)                        | 10 (21)                                     | 2 (4)                              | 2 (4)                                       |
| $\leq 4$ (-2SD), n (%)                        | 0 (0)                                       | 0 (0)                              | 0 (0)                                       |
| Gross motor scaled score, <i>median (IQR)</i> | 10 (8-12)                                   | 9 (7-12)                           | 11 (9-12)                                   |
| $\leq 7$ (-1SD), n (%)                        | 8 (17)                                      | 18 (37)                            | 9 (19)                                      |
| $\leq 4$ (-2SD), n (%)                        | 1 (2)                                       | 8 (16)                             | 3 (6)                                       |
| <b>Cerebral palsy</b>                         | <b>n=46<sup>*(2), ***(1), ***(2a)</sup></b> | <b>n=47<sup>*(2), ***(2)</sup></b> | <b>n=45<sup>*(1), ***(3), ***(2b)</sup></b> |
| High risk of CP, n (%)                        | 1 (2)                                       | 2 (4)                              |                                             |
| Development of CP, n (%)                      |                                             |                                    | 1 (2)                                       |

<sup>\*(1)</sup> No show n=1, <sup>\*(2)</sup> n=2.

<sup>\*\*\*(1)</sup> State (crying) did not allow assessment n=1, <sup>\*\*\*(2)</sup> n=2, <sup>\*\*\*(3)</sup> n=3.

<sup>\*\*\*(2a)</sup> Clinical condition did not allow assessment at 3 months n=2, <sup>\*\*\*(2b)</sup> 2 infants with a high risk of cerebral palsy at 3 and 9 months were unable to visit the outpatient clinic at 18 months because of a poor clinical condition and receiving therapy at the rehabilitation centre.
